# Supplementary material
Source: PubMed Central journal article supplement (PMC6137679)
Supplement: AnnalsATS.201712-961OC_vorona_data_supplement.pdf [file AnnalsATS.201712-961OC_vorona_data_supplement.pdf]

## **Online Data Supplement**

### **Inspiratory Muscle Rehabilitation in Critically Ill Adults: A Systematic Review and Meta-Analysis**

Stefannie Vorona MSc, Umberto Sabatini MD, Sulaiman Al-Maqbali MD, Michele Bertoni MD, Martin Dres MD, Bernie Bissett PhD, Frank Van Haren MD PhD, A. Daniel Martin PhD, Cristian Urrea MD, Debbie Brace BSc, Matteo Parotto MD, Margaret S. Herridge MD MPH, Neill K. J. Adhikari MD MSc, Eddy Fan MD PhD, Luana T. Melo PhD, W. Darlene Reid PhD, Laurent J. Brochard MD, Niall D. Ferguson MD MSc, Ewan C. Goligher MD PhD

## Search Strategy

We employed Medical Subject Headings and keywords for studies of critically ill, mechanically ventilated patients who underwent IMT were used to search all databases: Intensive care units OR intensive care OR critical care OR critical illness OR respiratory insufficiency OR artificial respiration OR positive-pressure respiration OR mechanical ventilation), AND (respiratory muscle training OR inspiratory muscle training OR respiratory muscles OR breathing exercises OR physiotherapy. Proceedings of the American Thoracic Society and European Society of Intensive Care Medicine conferences from 2011-2017 were reviewed for potential studies of interest. We also searched the bibliographies of included studies and review articles.

## Statistical Analysis

Mean changes in variables from pre- to post-treatment were computed by subtraction; the standard deviation (SD) of the change was estimated by

$$\sqrt{SD_{pre-IMT}^2 + SD_{post-IMT}^2 + 2 \cdot SD_{pre-IMT} \cdot SD_{post-IMT} \cdot \rho}$$
 where  $\rho$  is the assumed correlation

between pre- and post-treatment values (assumed to be 0.8 in our analysis, as this gave computed values that closely match actual values for studies that reported the actual standard deviation of the change).

The logarithm of the ratio of means (mean post-treatment MIP:mean pre-treatment MIP) was computed for each arm of each study. The variance of the logarithm of ratio of means was computed as:

$$\frac{1}{n_{post}} \left( \frac{sd_{post}}{mean_{post}} \right)^2 + \frac{1}{n_{pre}} \left( \frac{sd_{pre}}{mean_{pre}} \right)^2 + 2 \cdot \rho \cdot \left( \sqrt{\frac{1}{n_{post}} \left( \frac{sd_{post}}{mean_{post}} \right)^2} \right) \cdot \left( \sqrt{\frac{1}{n_{pre}} \left( \frac{sd_{pre}}{mean_{pre}} \right)^2} \right)$$

according to a previously reported technique (1). Again,  $\rho$  was assumed to be 0.8. These ratio of means values were pooled by computing the difference in the log(ratio of means) between IMT and control.

The variance of this difference was computed by adding the variance of the logarithm of the ratio of

means for the experimental and control groups. Effects were pooled across studies using the generic inverse variance method [1].

**Table E1.** Characteristics of studies of inspiratory muscle training in critically ill patients

| Reference                      | Objectives                                                                                              | Study Design      | Population                                                                                                                                               | N  | Intervention and Control                                                                                                                                                                                                     | Timing & Duration                                                               |
|--------------------------------|---------------------------------------------------------------------------------------------------------|-------------------|----------------------------------------------------------------------------------------------------------------------------------------------------------|----|------------------------------------------------------------------------------------------------------------------------------------------------------------------------------------------------------------------------------|---------------------------------------------------------------------------------|
| <b>Bissett et al. 2016 (2)</b> | Evaluate the impact of IMT on recovery after acute respiratory failure requiring mechanical ventilation | Single-center RCT | Patients who were successfully liberated from the ventilator (48 hours to 7 days post-extubation) after $\geq 7$ days of invasive mechanical ventilation | 70 | Threshold loading (threshold IMT device, Respronics) initiated at 50% of $P_{i,max}$ then increased to highest tolerable intensity (five sets of six breaths per session) conducted daily for 2 weeks<br><br>Control: no IMT | IMT initiated after extubation and applied for 2 weeks                          |
| <b>Cader et al. 2010 (3)</b>   | Evaluate effect of IMT on $P_{i,max}$                                                                   | Single-center RCT | Patients aged $\geq 70$ years on mechanical ventilation for $\geq 48$ hours                                                                              | 28 | Threshold loading (threshold IMT device) commenced at 30% of $P_{i,max}$ , increased by 10% per day as tolerated, applied for 5 minutes twice per day<br><br>Control: no IMT                                                 | IMT was applied at the start of weaning until extubation                        |
| <b>Caruso et al. 2005 (4)</b>  | Evaluate the effect of IMT from onset of MV on duration of weaning and reintubation rate                | Single-center RCT | Patients predicted to required invasive mechanical ventilation for $\geq 72$ hours                                                                       | 40 | Threshold loading (ventilator pressure trigger set to 20% of $P_{i,max}$ ) applied for 5 minutes, progressively prolonged to 30 minutes, then load increased by 10% of $P_{i,max}$<br><br>Control: no IMT                    | IMT was applied 24 hours after starting mechanical ventilation until extubation |
| <b>Chang et al. 2011 (5)</b>   | Evaluate the effect of sitting in a chair during exercise training on $P_{i,max}$                       | Single-center RCT | Patients on mechanical ventilation for $\geq 72$ hours                                                                                                   | 34 | Transferred from bed to sit in chair for 30-120 minutes as tolerated<br><br>Control: no physical therapy                                                                                                                     | 6 days                                                                          |

| Reference                       | Objectives                                                                                                | Study Design      | Population                                                                                        | N  | Intervention and Control                                                                                                                                                                                 | Timing & Duration                                                                                |
|---------------------------------|-----------------------------------------------------------------------------------------------------------|-------------------|---------------------------------------------------------------------------------------------------|----|----------------------------------------------------------------------------------------------------------------------------------------------------------------------------------------------------------|--------------------------------------------------------------------------------------------------|
| <b>Condessa et al. 2013 (6)</b> | Evaluate the effect of IMT on duration of weaning from mechanical ventilation                             | Single-center RCT | Adults receiving mechanical ventilation for > 48 hours meeting readiness-to-wean criteria         | 92 | Threshold loading (threshold IMT device) at 40% of MIP; 5 sets of 10 breaths performed twice daily<br><br>Control: no IMT                                                                                | IMT was applied until extubation, tracheostomy, death, or resumption of controlled ventilation   |
| <b>Dixit et al. 2014 (7)</b>    | Evaluate the effect of IMT on duration of weaning from mechanical ventilation                             | Single-center RCT | Adults receiving mechanical ventilation > 24 hours meeting readiness-to-wean criteria             | 30 | Threshold loading (threshold IMT device) at 30% of $P_{i,max}$ , adjusted to patient tolerance, increased daily by 10% of $P_{i,max}$ ; 5 sets of 6 breaths performed twice daily<br><br>Control: no IMT | IMT was applied 7 days per week until extubation                                                 |
| <b>Holliday et al. 1990 (8)</b> | Evaluate the effect of respiratory pattern biofeedback on duration of weaning from mechanical ventilation | Single-center RCT | Patients receiving mechanical ventilation for $\geq 7$ days                                       | 40 | Biofeedback-guided deep breathing exercises via respiratory inductance plethysmography for 30-50 minutes per day<br><br>Control: usual care                                                              | IMT was applied at the start of weaning for 5 days per week until weaned from ventilator support |
| <b>Ibrahiem et al. 2014 (9)</b> | Evaluate the effect of IMT in mechanically ventilated patients                                            | Single-center RCT | Adults receiving mechanical ventilation for at least 3-7 days who meet readiness-to-wean criteria | 30 | Threshold loading (threshold IMT device) at 20% of $P_{i,max}$ (increased by 1-2 cm $H_2O$ per day); 5 sets of 6 breaths twice daily<br><br>Control: no IMT                                              | 3 days                                                                                           |

| Reference                         | Objectives                                                                                                    | Study Design      | Population                                                                                                | N  | Intervention and Control                                                                                                                                                                              | Timing & Duration                                                   |
|-----------------------------------|---------------------------------------------------------------------------------------------------------------|-------------------|-----------------------------------------------------------------------------------------------------------|----|-------------------------------------------------------------------------------------------------------------------------------------------------------------------------------------------------------|---------------------------------------------------------------------|
| <b>Martin AD et al. 2011 (10)</b> | Evaluate the effect of IMT on weaning from mechanical ventilation                                             | Single-center RCT | Patients with difficult weaning from mechanical ventilation ( $\geq 72$ hours of weaning)                 | 69 | Threshold loading (threshold IMT device) applied at the highest tolerable pressure threshold; 4 sets of 6-10 breaths per day (2 minutes of rest on ventilation between sets)<br><br>Control: sham IMT | IMT was applied until weaned from ventilator support or for 28 days |
| <b>Melo et al. 2017 (11)</b>      | Elucidate the effect of IMT on patients with traumatic brain injuries (TBI) undergoing mechanical ventilation | Single-center RCT | TBI patients receiving mechanical ventilation for more than 7 days                                        | 10 | Threshold loading device (threshold IMT device), at 50% of daily MIP.<br><br>Control: usual care                                                                                                      | IMT was applied for 2 weeks                                         |
| <b>Mohamed et al. 2014 (12)</b>   | Evaluate the effect of IMT on respiratory muscle strength                                                     | Single-center RCT | Patients requiring invasive mechanical ventilation for $\geq 48$ hours meeting readiness-to-wean criteria | 40 | Threshold loading (threshold IMT device) initially applied at 30% of $P_{i,max}$ ; 5-6 sets of 6 breaths, twice daily; increased by 1-2 cm H <sub>2</sub> O daily as tolerated<br><br>Control: no IMT | 7 days                                                              |

| Reference                         | Objectives                                                                                                             | Study Design      | Population                                                                                              | N  | Intervention and Control                                                                                                                                                                                                                             | Timing & Duration                        |
|-----------------------------------|------------------------------------------------------------------------------------------------------------------------|-------------------|---------------------------------------------------------------------------------------------------------|----|------------------------------------------------------------------------------------------------------------------------------------------------------------------------------------------------------------------------------------------------------|------------------------------------------|
| <b>Nava et al. 1998 (13)</b>      | Evaluate the physiological effects of pulmonary rehabilitation after acute respiratory failure                         | Single-center RCT | COPD patients recovering from acute respiratory failure (76% receiving ventilator support at enrolment) | 80 | Postural training, early ambulation, IMT by threshold loading (threshold IMT device) applied at 50% of $P_{i,max}$ for 10 minutes twice daily, cycling, stair climbing, treadmill training<br><br>Control: no IMT                                    | Not specified                            |
| <b>Özyürek et al. 2014 (14)</b>   | Evaluate the effect of post-operative IMT on respiratory muscle strength after upper abdominal surgery                 | Single-center RCT | Patients undergoing upper abdominal surgery                                                             | 40 | IMT commenced on day of extubation. Threshold loading (threshold IMT device) initially applied at 30% of MIP for 15 minutes daily, pressure titrated up by 2 cm H <sub>2</sub> O per day as tolerated based on exertion score<br><br>Control: no IMT | IMT was applied until hospital discharge |
| <b>Pascotini et al. 2014 (15)</b> | Evaluate the effect of respiratory muscle training on respiratory muscle strength in patients weaning from ventilation | Single-center RCT | Patients ≥ 40 years of age with tracheostomy undergoing weaning from ventilation                        | 14 | Threshold loading (threshold IMT device) applied at 20% of $P_{i,max}$ for 3 sets of 10 breaths once daily.<br><br>Control: no IMT                                                                                                                   | 7 days                                   |

| Reference                       | Objectives                                                                                      | Study Design      | Population                                                                            | N  | Intervention and Control                                                                                                                                                                                                                                                                                                                                        | Timing & Duration |
|---------------------------------|-------------------------------------------------------------------------------------------------|-------------------|---------------------------------------------------------------------------------------|----|-----------------------------------------------------------------------------------------------------------------------------------------------------------------------------------------------------------------------------------------------------------------------------------------------------------------------------------------------------------------|-------------------|
| <b>Porta et al. 2005 (16)</b>   | To evaluate the feasibility of upper extremity exercise training added to general physiotherapy | Multi-center RCT  | Patients successfully weaned after prolonged mechanically ventilation                 | 66 | Upper-arm cycling on the arm ergometer:<br>Incremental tests (IT): 1-minute exercise, followed by 1-minute unloaded cycling at 40-45 cycles/minute then increase the load by 2.5W/min until reach exhaustion<br>Endurance test: 50% of peak work rate reached on IT cycling at 40-45 cycles/minute until exhaustion<br><br>Control: no upper extremity exercise | 15 days           |
| <b>Saad et al. 2014 (17)</b>    | Evaluate the effect of employing an IMT device on respiratory muscle strength                   | Single-center RCT | Difficult-to-wean patients with a tracheostomy                                        | 25 | Threshold loading (threshold IMT device) initially applied at 30% of initial $P_{i,max}$ , increasing by 10% daily; 3 sets of 10 cycles once daily<br><br>Control: no IMT                                                                                                                                                                                       | Not specified     |
| <b>Shimizu et al. 2014 (18)</b> | Evaluate the effect of IMT on weaning outcome (secondary objective)                             | Single-center RCT | Patients receiving invasive mechanical ventilation for $\geq 48$ hours who fail a SBT | 13 | Threshold loading (threshold IMT device) applied at 50% of $P_{i,max}$ for 3 sets of 10 breaths, twice daily<br><br>Control: no IMT                                                                                                                                                                                                                             | 4 days            |



| Reference                             | Objectives                                                                                                               | Study Design      | Population                                                                                                    | N  | Intervention and Control                                                                                                                                                                | Timing & Duration                                        |
|---------------------------------------|--------------------------------------------------------------------------------------------------------------------------|-------------------|---------------------------------------------------------------------------------------------------------------|----|-----------------------------------------------------------------------------------------------------------------------------------------------------------------------------------------|----------------------------------------------------------|
| <b>Shrestha et al. 2014 (19)</b>      | Explore the feasibility and safety of using IMT to exercise the respiratory muscles in critically ill intubated patients | Single-center RCT | Mechanically ventilated patients who failed a 2-hour spontaneous breathing trial (lasting at least 5 minutes) | 7  | Threshold loading (threshold IMT device), protocol not otherwise specified<br><br>Control: sham IMT                                                                                     | Not specified                                            |
| <b>Tonella et al. 2017 (20)</b>       | Compare effects of electronic IMT (eIMT) with an intermittent nebulization program (INP)                                 | Single-center RCT | Tracheostomized patients meeting readiness-to-wean criteria                                                   | 19 | Threshold loading (threshold IMT device), at 30% of initial MIP, increasing by 10% daily; 3 sets of 10 breaths conducted twice daily<br><br>Control: INP through a T-piece until weaned | IMT and INP applied until weaned from ventilator support |
| <b>Yosef-Brauner et al. 2015 (21)</b> | Evaluate the effect of an intensive physical therapy protocol in patients with ICU-acquired weakness                     | Single-center RCT | Patients on mechanical ventilation for $\geq 48$ hours and anticipated to require additional $\geq 48$ hours  | 18 | Passive and active range-of-motion exercise, breathing exercises (not otherwise specified), trunk exercise, manual hyperinflation, ambulation<br><br>Control: no IMT                    | Physical therapy was applied until ICU discharge         |

| Reference                       | Objectives                                                                                                                   | Study Design                                              | Population                                                    | N  | Intervention and Control                                                                                                                                                                   | Timing & Duration                                                                                                   |
|---------------------------------|------------------------------------------------------------------------------------------------------------------------------|-----------------------------------------------------------|---------------------------------------------------------------|----|--------------------------------------------------------------------------------------------------------------------------------------------------------------------------------------------|---------------------------------------------------------------------------------------------------------------------|
| <b>Aldrich et al. 1989 (22)</b> | Improve respiratory muscle endurance by IMT                                                                                  | Single-group observational study                          | MV duration $\geq$ 3 weeks and repeated failed T-piece trials | 30 | Applied inspiratory resistance (starting at 8 cm H <sub>2</sub> O/L/sec at 0.25 L/sec) for 5-10 minutes and progressively increased duration (maximum of 30 minutes) and resistance level. | IMT applied for at least 2 weeks until weaned from ventilator support or treatment failure (no improvement in MIP). |
| <b>Barros et al. 2015 (23)</b>  | Evaluate the effect of standardized mobilization protocol on respiratory muscle strength in mechanically ventilated patients | Single-group observational trial                          | Mechanically ventilated patients                              | 10 | 5-phase mobilization strategy (progression from passive mobilization to walking)                                                                                                           | Not specified                                                                                                       |
| <b>Chiang et al. 2006 (24)</b>  | Evaluate the effect of physical therapy (PT) on respiratory and limb muscle strength                                         | Single-center observational study with control comparison | Patients on mechanical ventilation for > 14 days              | 39 | Upper and lower extremity strengthening exercises and diaphragmatic breathing exercises<br><br>Control: no PT                                                                              | IMT was applied 5 times per week for 6 weeks                                                                        |

| Reference                         | Objectives                                                                                                     | Study Design                                              | Population                                                                                    | N  | Intervention and Control                                                                                                                                                                                                                                              | Timing & Duration                                                      |
|-----------------------------------|----------------------------------------------------------------------------------------------------------------|-----------------------------------------------------------|-----------------------------------------------------------------------------------------------|----|-----------------------------------------------------------------------------------------------------------------------------------------------------------------------------------------------------------------------------------------------------------------------|------------------------------------------------------------------------|
| <b>Elbouhy et al. 2014 (25)</b>   | Evaluate the effect of IMT on duration of weaning from mechanical ventilation in COPD patients                 | Single-center observational study with control comparison | Patients with prolonged weaning from mechanical ventilation after acute exacerbations of COPD | 40 | Threshold loading (PSV 8 cm H <sub>2</sub> O, ventilator pressure trigger set at 20% of P <sub>i,max</sub> ) applied for 5 minutes; duration progressively increased to 30 minutes, then threshold load increased by 10% of P <sub>i,max</sub><br><br>Control: no IMT | IMT was applied for 5 days                                             |
| <b>Martin AD et al. 2002 (26)</b> | Evaluate the effect of IMT on weaning from mechanical ventilation                                              | Case series                                               | Patients with prolonged weaning from mechanical ventilation (≥7 days of weaning)              | 10 | Threshold loading (threshold IMT device) adjusted to exertion level; 3-5 sets of 6 breaths once daily                                                                                                                                                                 | IMT was applied 5-7 days per week until weaned from ventilator support |
| <b>Martin UJ et al. 2005 (27)</b> | Evaluate the effect of physical therapy on weaning from mechanical ventilation and respiratory muscle strength | Retrospective cohort                                      | Patients with prolonged mechanical ventilation ≥ 14 days, failed at least 2 weaning attempts  | 49 | Comprehensive physical therapy program including IMT by threshold loading (threshold IMT device) at 1/3 of P <sub>i,max</sub> for 15 minutes twice daily                                                                                                              | IMT was applied until weaned from ventilator support                   |
| <b>Sprague et al. 2003 (28)</b>   | Describe the rationale and application of IMT in difficult weaning from ventilation                            | Case series                                               | Mechanically ventilated patients requiring prolonged weaning                                  | 6  | Threshold loading (threshold IMT device), at approximately 50% of P <sub>i,max</sub> ; 4 sets of 6-8 breaths conducted daily                                                                                                                                          | IMT was applied until ICU discharge                                    |

| Reference                        | Objectives                                                                                  | Study Design                      | Population                       | N  | Intervention and Control | Timing & Duration          |
|----------------------------------|---------------------------------------------------------------------------------------------|-----------------------------------|----------------------------------|----|--------------------------|----------------------------|
| <b>Supinski et al. 2017 (29)</b> | Determine physical therapy (PT) would improve inspiratory muscle strength and lung function | Single-center observational study | Mechanically ventilated patients | 22 | PT                       | PT was applied for 2 weeks |

**Table E2. Methodological quality of observational studies using the Newcastle Ottawa Scale**

| <b>Study</b>  | <b>Selection</b> | <b>Comparability</b> | <b>Outcome</b> |
|---------------|------------------|----------------------|----------------|
| Aldrich 1989  | *                |                      | ***            |
| Barros 2015   | *                |                      |                |
| Chiang 2006   | ***              |                      | ***            |
| Elbouhy 2014  | ***              | *                    | ***            |
| Martin 2002   | *                |                      | ***            |
| Martin 2005   | *                |                      | ***            |
| Sprague 2003  | *                |                      | ***            |
| Supinski 2017 | *                |                      |                |

A study can be awarded a maximum of four stars in the Selection category, a maximum of two stars can be given for Comparability, a maximum of three stars in the Outcome category. The number of stars indicates the methodologic quality of the study. Fewer stars corresponds with lower quality.

**Table E3.** Methodological Characteristics of Maximal Inspiratory Pressure Measurement

| Study              | Quality Marker |               |                                |                                       |
|--------------------|----------------|---------------|--------------------------------|---------------------------------------|
|                    | Coaching       | One-way valve | Patient awake and co-operative | MIP Assessor Blinded to Randomization |
| Aldrich 1989       | Yes            | No            | Yes                            | -*                                    |
| Barros 2015        | -              | -             | -                              | -                                     |
| Bissett 2016       | Yes            | -             | Yes                            | Yes                                   |
| Cader 2010         | No             | Yes           | -                              | No                                    |
| Caruso 2005        | -              | Yes           | -                              | -                                     |
| Chang 2011         | -              | -             | -                              | -                                     |
| Chiang 2006        | Yes            | -             | Yes                            | Yes                                   |
| Condessa 2013      | Yes            | Yes           | Yes                            | No                                    |
| Dixit 2014         | -              | -             | -                              | -                                     |
| Elbouhy 2014       | -              | -             | -                              | -                                     |
| Holliday 1990      | -              | -             | -                              | -                                     |
| Ibrahiem 2014      | -              | No            | Yes                            | -                                     |
| Martin 2002        | -              | -             | -                              | -                                     |
| Martin 2005        | -              | -             | -                              | -                                     |
| Martin 2011        | Yes            | Yes           | Yes                            | No                                    |
| Melo 2017          | -              | -             | -                              | Yes                                   |
| Mohamed 2014       | -              | -             | -                              | -                                     |
| Nava 1998          | Yes            | Yes           | Yes                            | -                                     |
| Özyürek 2014       | -              | -             | -                              | -                                     |
| Pascotini 2014     | Yes            | Yes           | Yes                            | No                                    |
| Porta 2005         | -              | -             | -                              | -                                     |
| Saad 2014          | -              | Yes           | -                              | -                                     |
| Shimizu 2014       | No             | Yes           | -                              | No                                    |
| Shrestha 2014      | -              | -             | -                              | -                                     |
| Sprague 2003       | Yes            | -             | Yes                            | -                                     |
| Tonella 2017       | No             | Yes           | -                              | No                                    |
| Yosef-Brauner 2015 | -              | -             | -                              | Yes                                   |

\*Hyphen = not reported

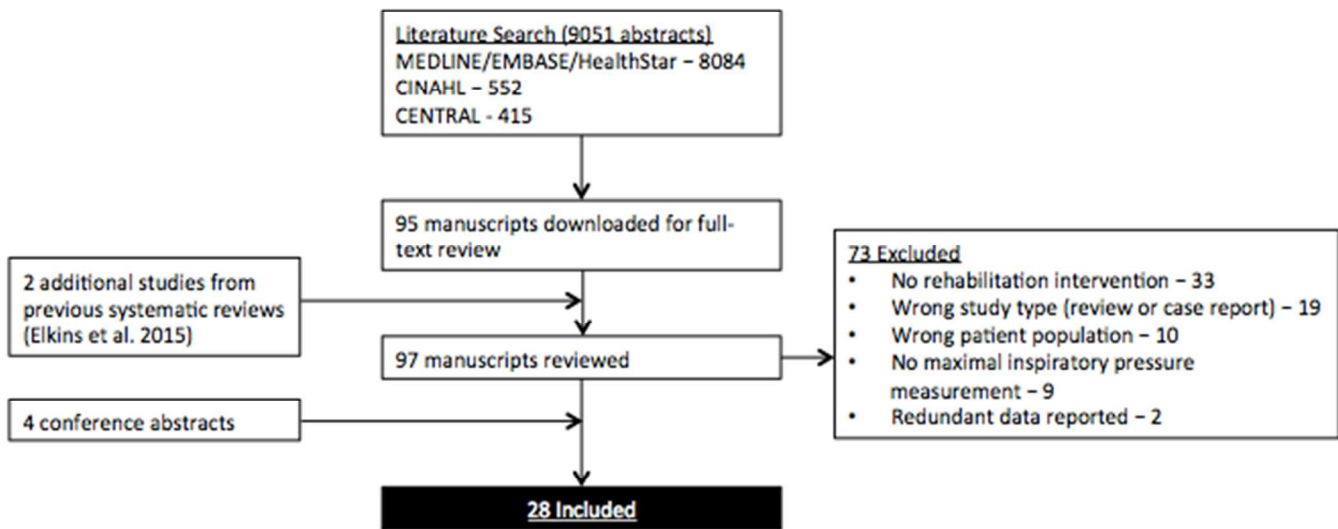

**Figure E1.** Study selection process for the systematic review.

|                | Random sequence generation (selection bias) | Allocation concealment (selection bias) | Blinding of participants and personnel (performance bias) | Blinding of outcome assessment (detection bias) | Incomplete outcome data (attrition bias) | Selective reporting (reporting bias) | Other bias |
|----------------|---------------------------------------------|-----------------------------------------|-----------------------------------------------------------|-------------------------------------------------|------------------------------------------|--------------------------------------|------------|
| Bissett 2016   | +                                           | +                                       | ?                                                         | +                                               | +                                        | +                                    | +          |
| Cader 2010     | +                                           | +                                       | ?                                                         | ?                                               | +                                        | +                                    | +          |
| Caruso 2005    | +                                           | ?                                       | ?                                                         | ?                                               | -                                        | +                                    | +          |
| Chang 2011     | +                                           | +                                       | ?                                                         | ?                                               | -                                        | +                                    | +          |
| Condessa 2013  | +                                           | +                                       | ?                                                         | +                                               | +                                        | +                                    | +          |
| Dixit 2014     | +                                           | ?                                       | ?                                                         | ?                                               | ?                                        | +                                    | +          |
| Holliday 1990  | +                                           | ?                                       | ?                                                         | ?                                               | +                                        | +                                    | -          |
| Ibrahiem 2014  | +                                           | ?                                       | ?                                                         | ?                                               | +                                        | +                                    | +          |
| Martin 2011    | +                                           | +                                       | +                                                         | ?                                               | +                                        | +                                    | +          |
| Melo 2017      | +                                           | ?                                       | ?                                                         | +                                               | +                                        | +                                    | +          |
| Mohamed 2014   | +                                           | ?                                       | ?                                                         | ?                                               | ?                                        | +                                    | +          |
| Nava 1998      | +                                           | ?                                       | ?                                                         | ?                                               | ?                                        | ?                                    | -          |
| Ozyürek 2014   | +                                           | ?                                       | ?                                                         | ?                                               | ?                                        | +                                    | +          |
| Pascotini 2014 | +                                           | ?                                       | ?                                                         | ?                                               | +                                        | +                                    | +          |
| Porta 2005     | +                                           | ?                                       | ?                                                         | ?                                               | +                                        | +                                    | +          |
| Saad 2014      | +                                           | ?                                       | ?                                                         | ?                                               | ?                                        | +                                    | +          |
| Shimizu 2014   | +                                           | +                                       | ?                                                         | ?                                               | +                                        | +                                    | -          |
| Shrestha 2014  | +                                           | ?                                       | ?                                                         | ?                                               | +                                        | +                                    | +          |
| Sprague 2003   | -                                           | ?                                       | ?                                                         | ?                                               | +                                        | +                                    | +          |
| Tonella 2017   | +                                           | +                                       | ?                                                         | ?                                               | +                                        | +                                    | +          |
| Yosef 2015     | +                                           | ?                                       | ?                                                         | +                                               | +                                        | +                                    | -          |

**Figure E2.** Risk of bias in randomized controlled trials. Red circles indicate serious risk of bias on the evaluated factor, green circles indicate low risk of bias, and yellow circles indicate uncertain risk of bias. Lack of blinding was deemed to result in an unclear bias (see text for details). “Other bias” refers to the use of co-interventions.



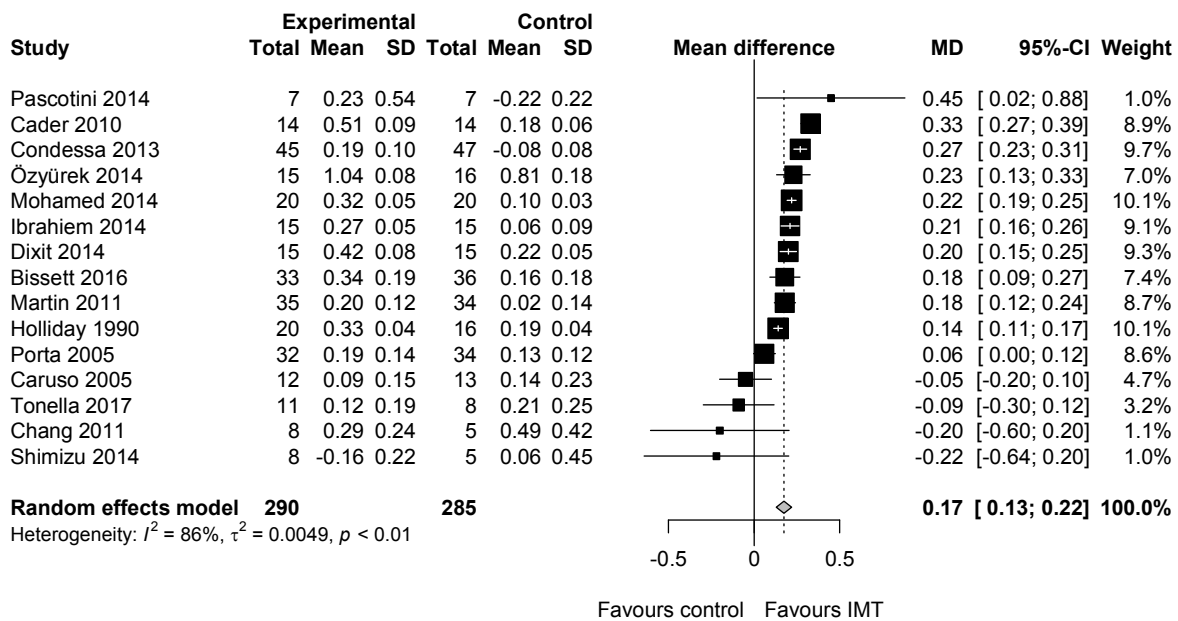

**Figure E3.** Pooled effect of IMT on MIP relative to baseline compared to controls. For this analysis, the difference in the logarithm of the ratio of post-treatment MIP to pre-treatment MIP between IMT and control (and the variance of this difference) for each study were pooled using the generic inverse variance method. Pooled effects were back transformed to obtain the estimate effect (pooled relative ratio of means 1.19 [95% CI 1.14-1.25]).

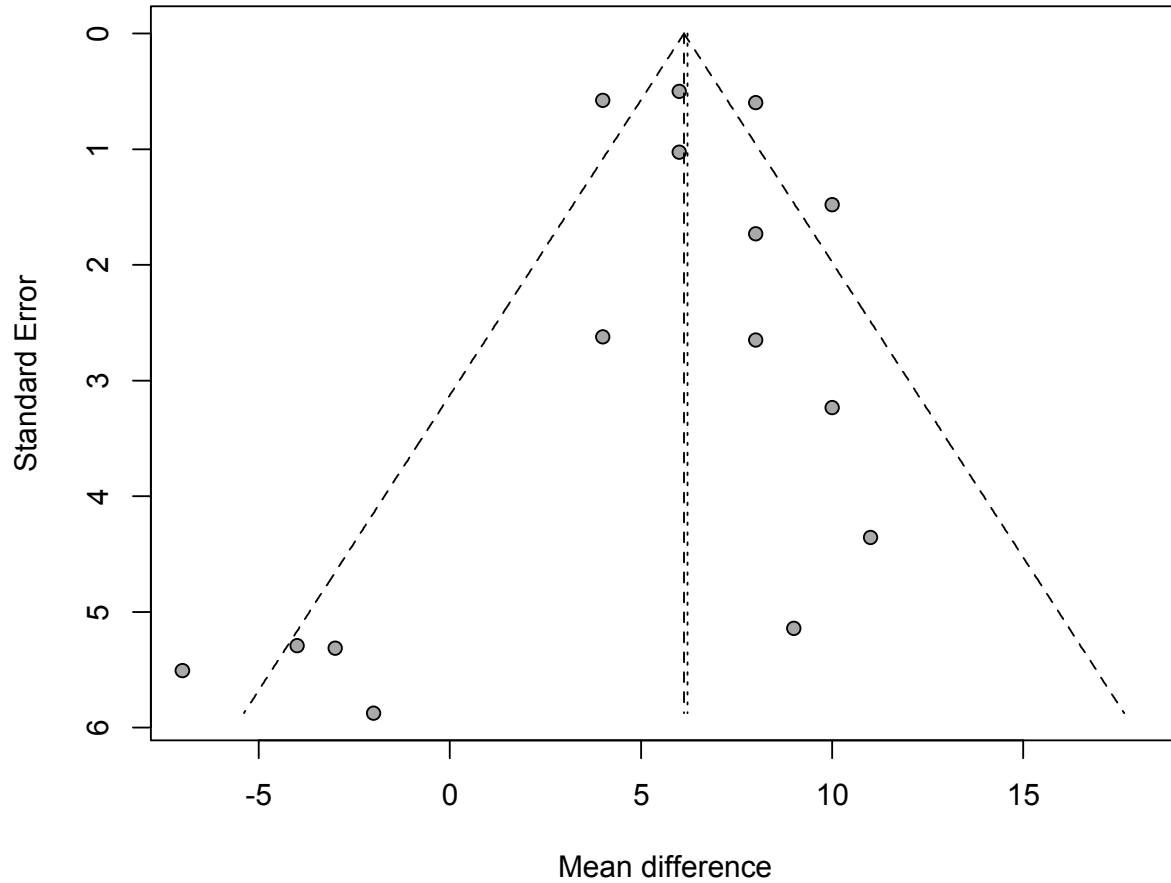

**Figure E4.** Funnel plot assessing for publication bias in primary end-point. No evidence of publication bias was detected ( $p=0.73$  for test of asymmetry by linear regression of treatment effect against standard error (30)).

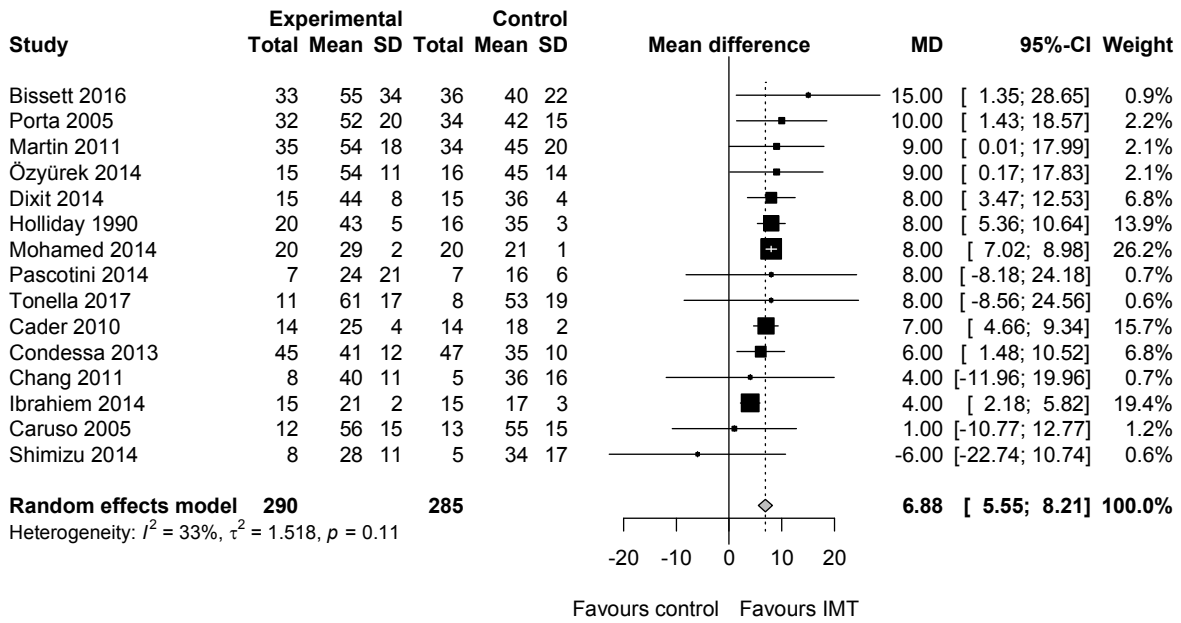

**Figure E5.** Effect of inspiratory muscle training on maximal inspiratory pressure at the completion of treatment course.

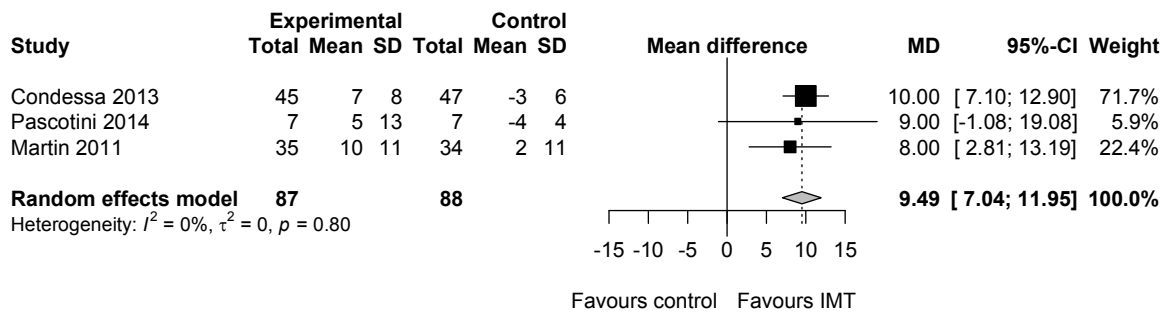

**Figure E6.** Sensitivity analysis of pooled effect of inspiratory muscle training on the increase in MIP from baseline in studies without high risk of bias that employed rigorous technique for measurement of MIP.

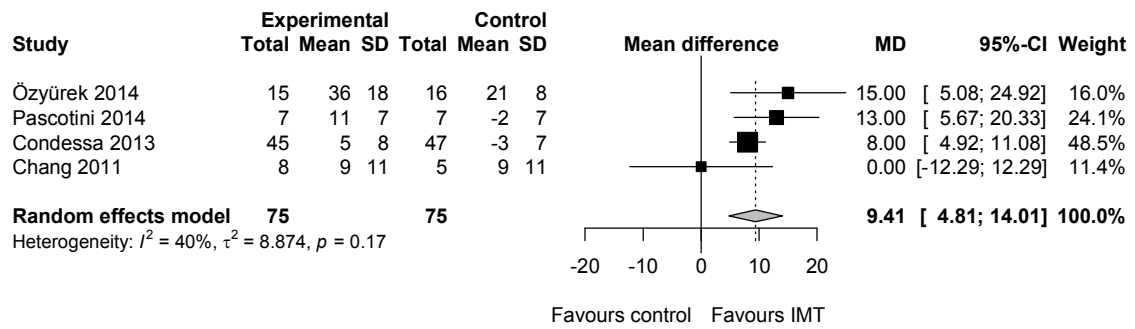

**Figure E7.** Impact of inspiratory muscle training on maximal expiratory pressure (MEP).

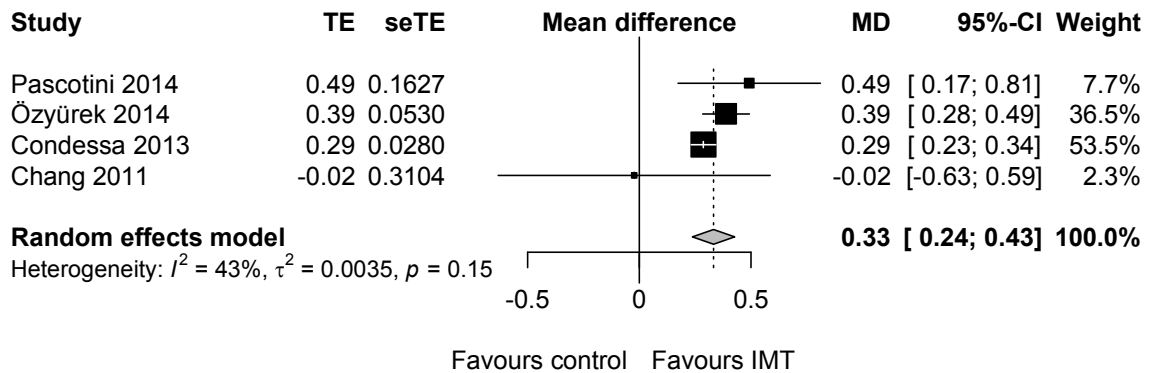

**Figure E8.** Pooled effect of IMT on maximal expiratory pressure (MEP) relative to baseline MEP compared to controls. For this analysis, the difference in the logarithm of the ratio of post-treatment MEP to pre-treatment MEP between IMT and control (and the variance of this difference) for each study were pooled using the generic inverse variance method. Pooled effects were back transformed to obtain the estimate effect (pooled relative ratio of means 1.39 [95% CI 1.27-1.54]).

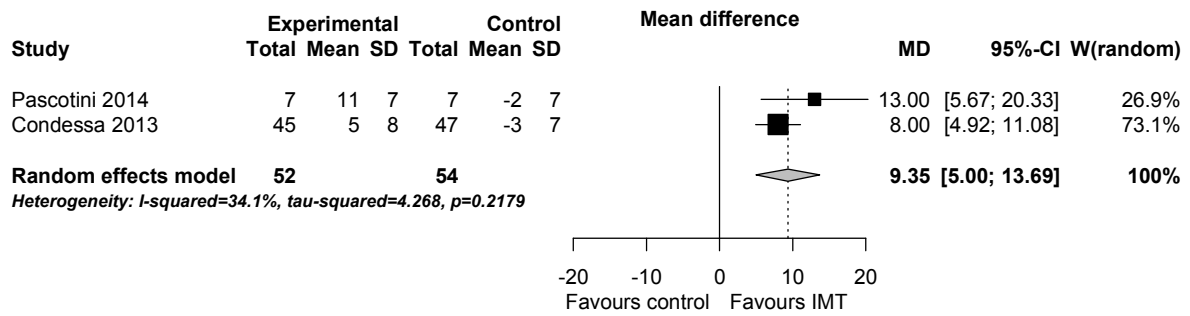

**Figure E9.** Sensitivity analysis of studies examining the impact of inspiratory muscle training on maximal expiratory pressure. For this analysis, studies at high risk of bias were excluded.

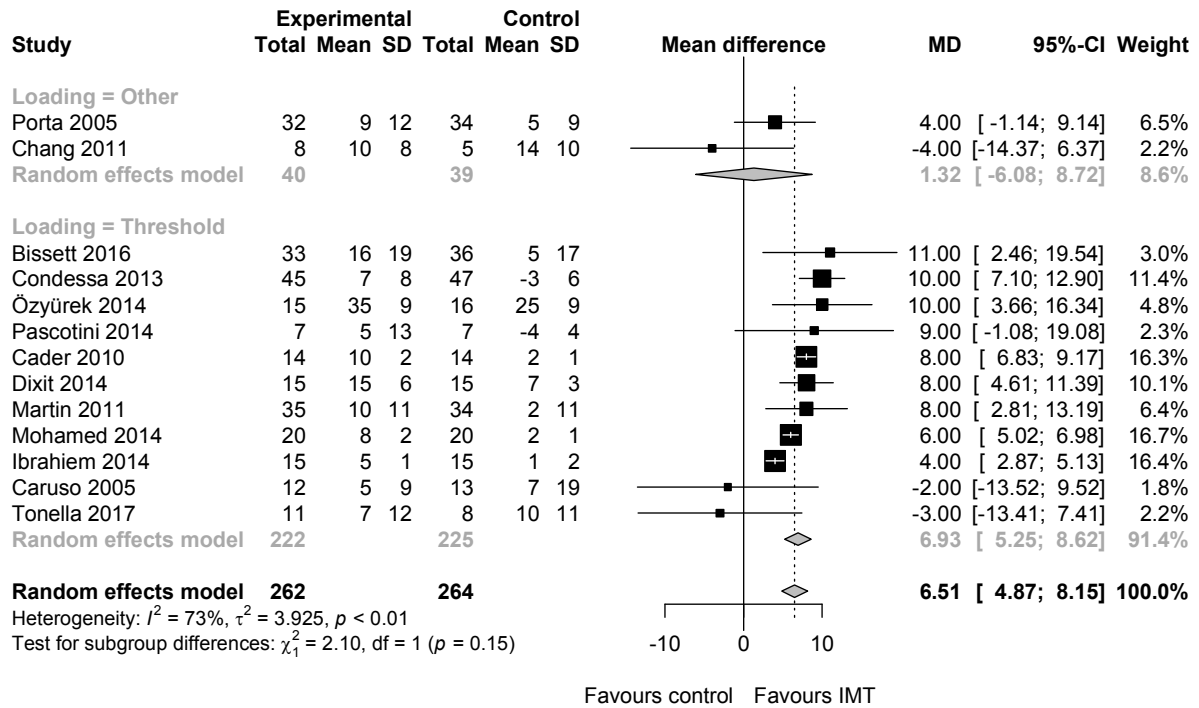

**Figure E10.** Comparative effect of threshold loading-based IMT regimen vs. other IMT regimen on respiratory muscle strength. Threshold loading was associated with significantly greater improvement in respiratory muscle strength.



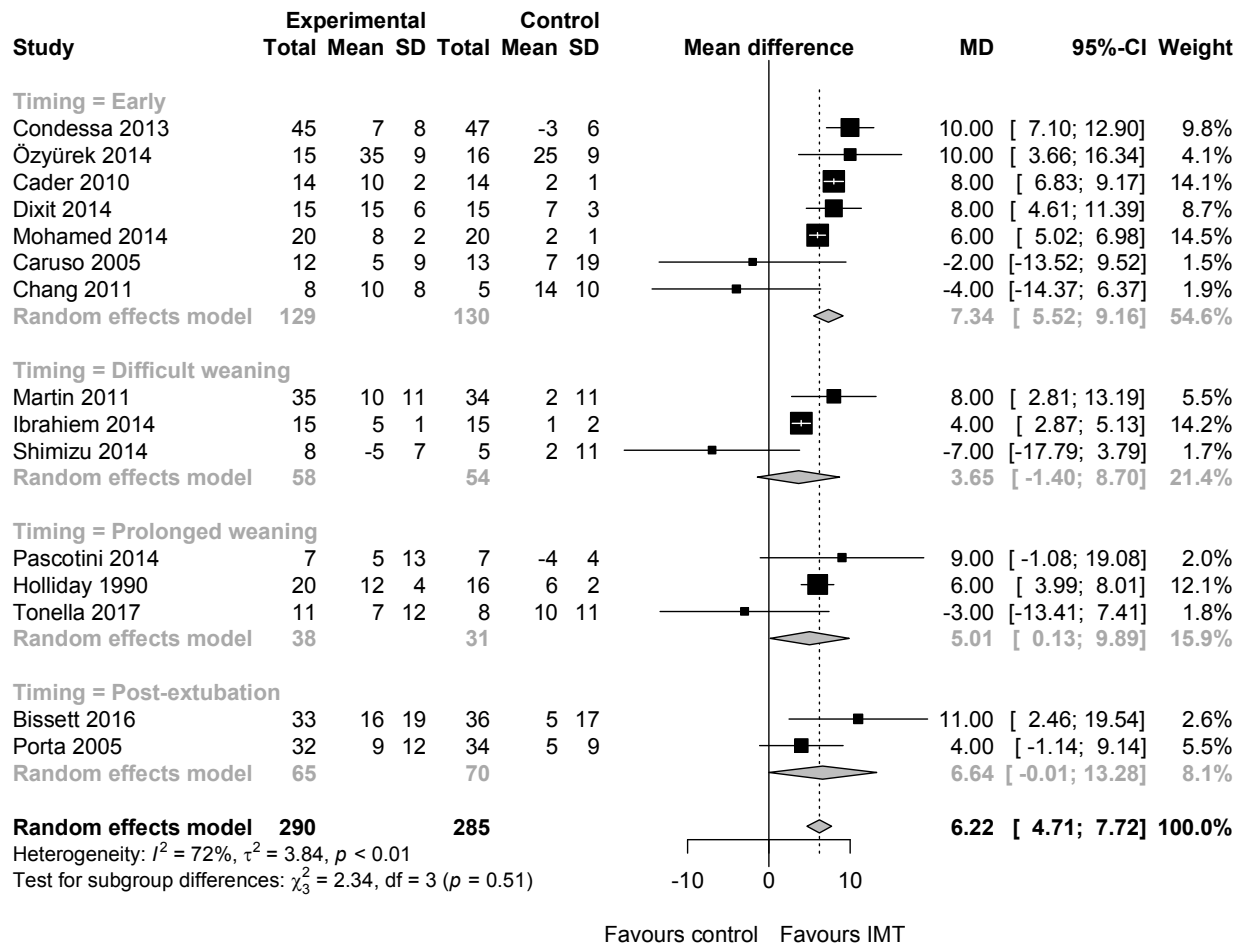

**Figure E11.** Effect of IMT on respiratory muscle strength when initiated at different time points in the course of critical illness and acute respiratory failure.

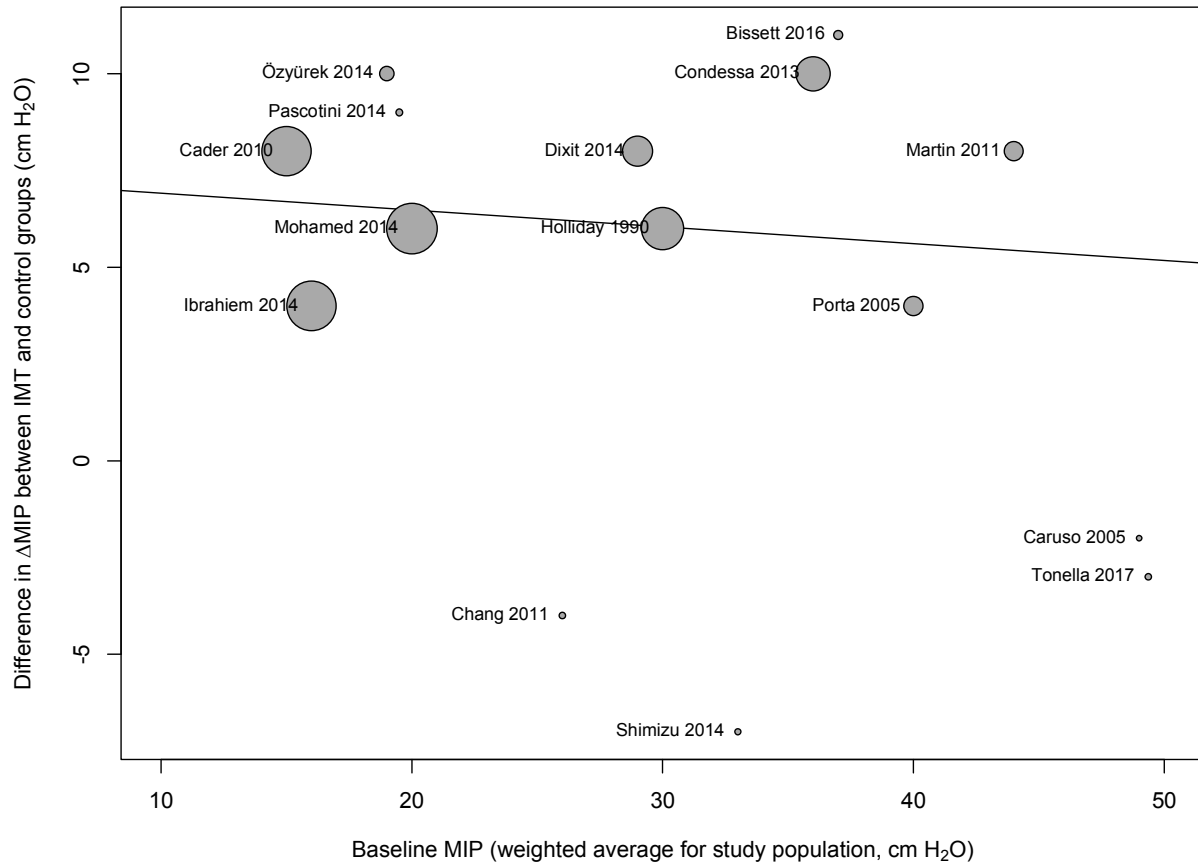

**Figure E12.** Relationship between pre-treatment maximal inspiratory pressure and treatment effect (increase in MIP from baseline). Treatment effect did not vary with baseline MIP ( $R^2=0\%$ ,  $p=0.11$ ).

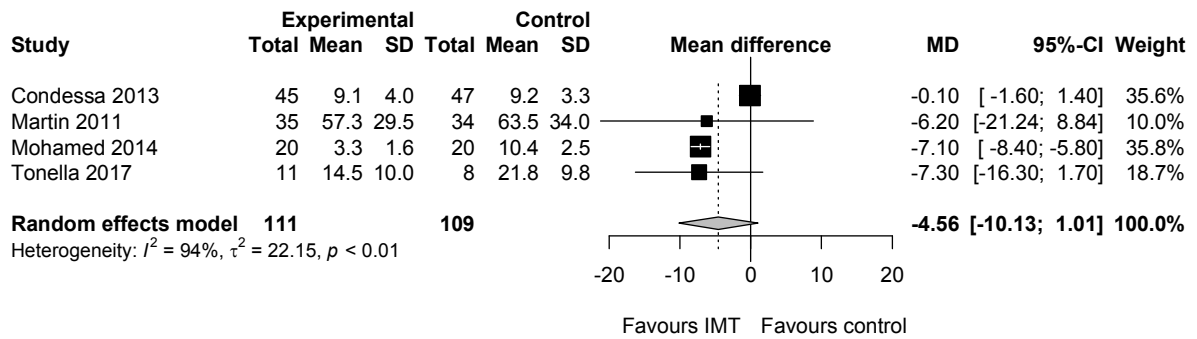

**Figure E13.** Sensitivity analysis of pooled effect of inspiratory muscle training on duration of mechanical ventilation in studies without serious risk of bias.

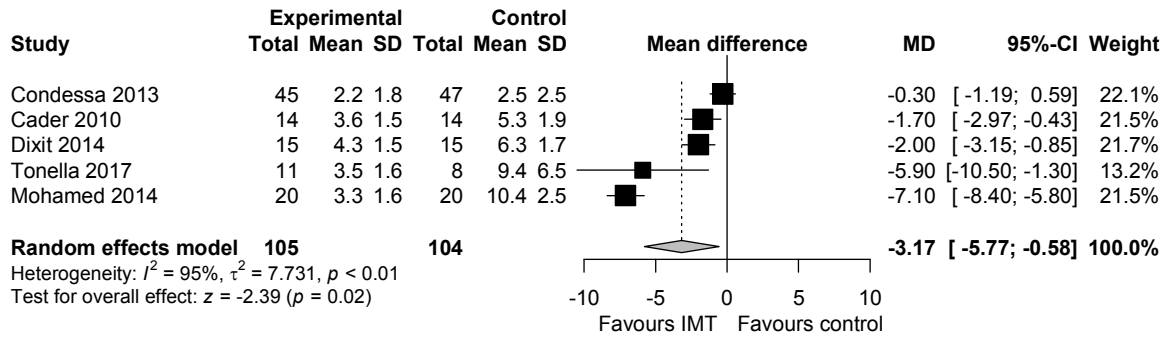

**Figure E14.** Impact of inspiratory muscle training on the duration of weaning in studies without serious risk of bias.

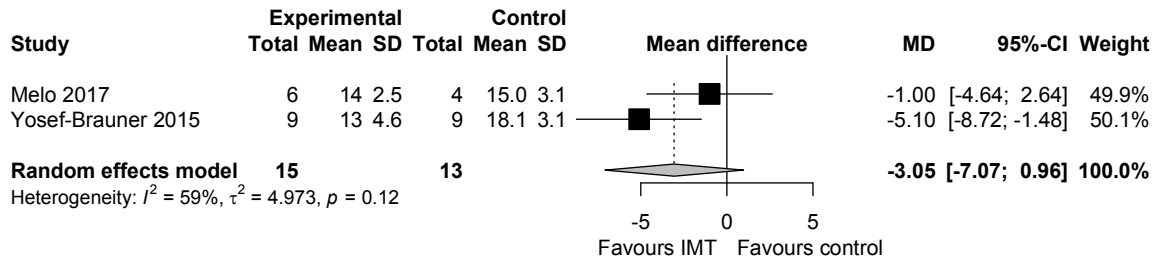

**Figure E15.** Impact of inspiratory muscle training on ICU length-of-stay.

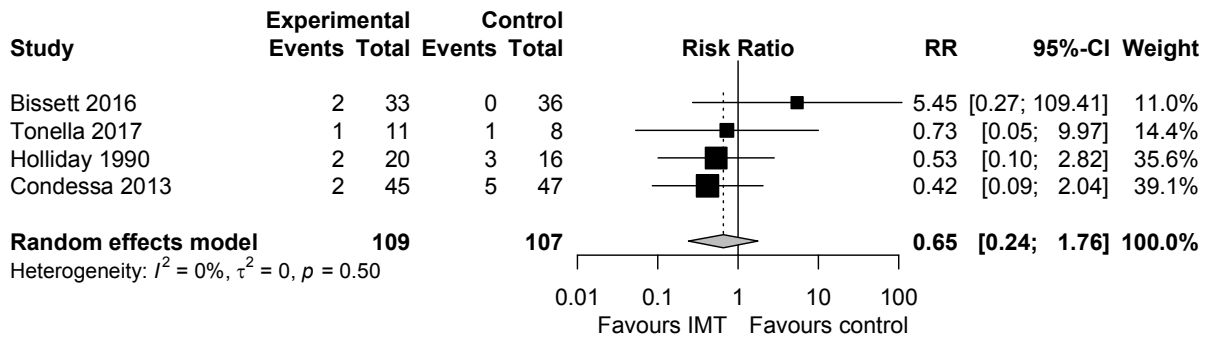

**Figure E16.** Impact of inspiratory muscle training on the risk of death in the intensive care unit.

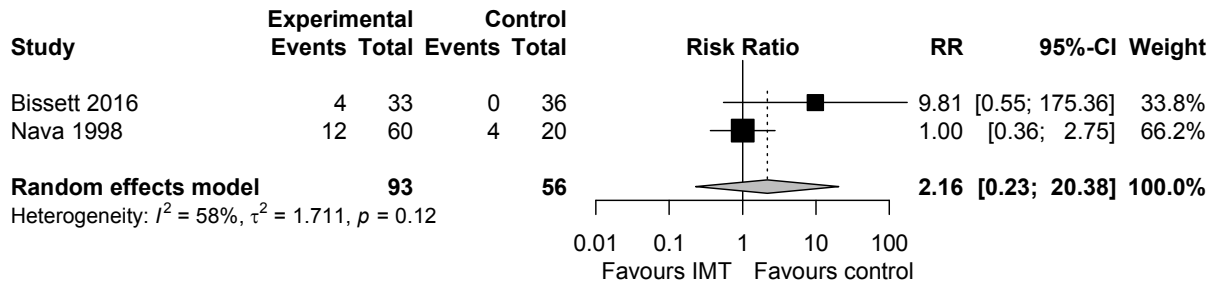

**Figure E17.** Impact of inspiratory muscle training on the risk of death in hospital.

## References

1. Friedrich JO, Adhikari NKJ, Beyene J. The ratio of means method as an alternative to mean differences for analyzing continuous outcome variables in meta-analysis: a simulation study. *BMC Med Res Methodol* 2008;8:32.
2. Bissett BM, Leditschke IA, Neeman T, Boots R, Paratz J. Inspiratory muscle training to enhance recovery from mechanical ventilation: a randomised trial. *Thorax* 2016;71:812–819.
3. Cader SA, Vale RG de S, Castro JC, Bacelar SC, Biehl C, Gomes MCV, Cabrer WE, Dantas EHM. Inspiratory muscle training improves maximal inspiratory pressure and may assist weaning in older intubated patients: a randomised trial. *J Physiother (Aust Physiother Assoc)* 2010;56:171–177.
4. Caruso P, Denari SDC, Ruiz SAL, Bernal KG, Manfrin GM, Friedrich C, Deheinzeln D. Inspiratory muscle training is ineffective in mechanically ventilated critically ill patients. *Clinics* 2005;60:479–484.
5. Chang M-Y, Chang L-Y, Huang Y-C, Lin K-M, Cheng C-H. Chair-sitting exercise intervention does not improve respiratory muscle function in mechanically ventilated intensive care unit patients. *Respir Care* 2011;56:1533–1538.
6. Condessa RL, Brauner JS, Saul AL, Baptista M, Silva ACT, VIEIRA SRR. Inspiratory muscle training did not accelerate weaning from mechanical ventilation but did improve tidal volume and maximal respiratory pressures: a randomised trial. *J Physiother (Aust Physiother Assoc)* 2013;59:101–107.
7. Dixit A, Prakash S. Effects of Threshold Inspiratory Muscle Training Versus Conventional Physiotherapy On The Weaning Period of Mechanically Ventilated Patients: A Comparative Study. *Int J Physiother Res* 2014;2:424–428.
8. Holliday JE, Hyers TM. The reduction of weaning time from mechanical ventilation using tidal volume and relaxation biofeedback. *Am Rev Respir Dis* 1990;141:1214–1220.
9. Ibrahiem AAA, Mohamed AR, Elbasiouny HS. Effect of Respiratory Muscles Training in Addition To Standard Chest Physiotherapy on Mechanically Ventilated Patients. *J Med Res Prac* 2014;3:52–58.
10. Martin AD, Smith BK, Davenport PD, Harman E, Gonzalez-Rothi RJ, Baz M, Layon AJ, Banner MJ, Caruso LJ, Deoghare H, Huang T-T, Gabrielli A. Inspiratory muscle strength training improves weaning outcome in failure to wean patients: a randomized trial. *Critical care (London, England)* 2011;15:R84.
11. Melo PF, Da Silva V, Vieira L, Lima L, Lira A, Silva PE, Barbosa P, Junior GC. High Intensity Inspiratory Muscle Training in Patients with Traumatic Brain Injury Under Mechanical Ventilation: Preliminary Results of a Randomized Controlled Trial. *Am J Resp Crit Care Med* 2017;195:A2749.
12. Mohamed AR, Basiouny HMS, Salem NM. Response of Mechanically Ventilated Respiratory Failure Patients to Respiratory Muscles Training. *Med J Cairo Univ* 2014;82:19–24.
13. Nava S. Rehabilitation of patients admitted to a respiratory intensive care unit. *Archives of Physical Medicine and Rehabilitation* 1998;79:849–854.
14. Özyürek S, Malkoç M, Günerli A, Koca U, Egeli T. Inpatient inspiratory muscle training after upper abdominal surgery. *ERJ* 2014;44:P3663.
15. Pascotini FDS, Denardi C, Nunes GO, Trvisan ME, Antunes VDP. Treinamento muscular respiratório em pacientes em desmame da ventilação mecânica [Respiratory muscle training in patients weaning from mechanical ventilation]. *ABCS Health Sci* 2014;39:12–16.
16. Porta R, Vitacca M, Gilè LS, Clini E, Bianchi L, Zanotti E, Ambrosino N. Supported arm training in patients recently weaned from mechanical ventilation. *Chest* 2005;128:2511–2520.



17. Saad IAB, Tonella R, Roceto LS, Delazari LEB, Castilho L, Falcao ALE, Silva PS. A new device for inspiratory muscle training in patients with tracheostomy tube in ICU. *ERJ* 2014;44:A4297.
18. Shimizu JM, Manzano RM, Quitério RJ, Alegria VTDC, Junqueira TT, El-Fakhouri S, Ambrozini ARP. Determinant factors for mortality of patients receiving mechanical ventilation and effects of a protocol muscle training in weaning. *mtprehabjournal* 2014;12:180–7.
19. Shrestha BK, Qutob HF, Files DC, Berry M, Dhar S, Bowton DL, Flores L, Kilgore R, Morris PE. Feasibility and Safety of Inspiratory Muscle Training in Critically Ill Intubated Patients. *Am J Respir Crit Care Med* 2014;189:A3883.
20. Tonella RM, Ratti LDSR, Delazari LEB, Junior CF, Da Silva PL, Herran ARDS, Santos Faez Dos DC, Saad IAB, De Figueiredo LC, Moreno R, Dragosvac D, Falcao ALE. Inspiratory Muscle Training in the Intensive Care Unit: A New Perspective. *J Clin Med Res* 2017;9:929–934.
21. Yosef-Brauner O, Adi N, Ben Shahar T, Yehezkel E, Carmeli E. Effect of physical therapy on muscle strength, respiratory muscles and functional parameters in patients with intensive care unit-acquired weakness. *Clin Respir J* 2015;9:1–6.
22. Aldrich TK, Karpel JP, Uhrlass RM, Sparapani MA, Eramo D, Ferranti R. Weaning from mechanical ventilation: adjunctive use of inspiratory muscle resistive training. *Critical Care Medicine* 1989;17:143–147.
23. Barros C, Lima A, Vilaca AF, Correia RF, Goncalves TF, Silva RMO, Cardozo SM, Rattes CFS, Souza HCM, Brandao SC, Dornelas AFA. Impact of standardized mobilization in mechanically ventilated patients on respiratory muscular strength. *ERJ* 2015;46:PA2171.
24. Chiang L-L, Wang L-Y, Wu C-P, Wu H-D, Wu Y-T. Effects of physical training on functional status in patients with prolonged mechanical ventilation. *Phys Ther* 2006;86:1271–1281.
25. Elbouhy MS, AbdelHalim HA, Hashem AMA. Effect of respiratory muscles training in weaning of mechanically ventilated COPD patients. *Egyptian Journal of Chest Diseases and Tuberculosis* 2014;63:679–687.
26. Martin AD, Davenport PD, Franceschi AC, Harman E. Use of inspiratory muscle strength training to facilitate ventilator weaning: a series of 10 consecutive patients. *Chest* 2002;122:192–196.
27. Martin UJ, Hincapie L, Nimchuk M, Gaughan J, Criner GJ. Impact of whole-body rehabilitation in patients receiving chronic mechanical ventilation. *Critical Care Medicine* 2005;33:2259–2265.
28. Sprague SS, Hopkins PD. Use of inspiratory strength training to wean six patients who were ventilator-dependent. *Phys Ther* 2003;83:171–181.
29. Supinski GS, Netzel PF, Valentine EN, Callahan LA. Effect Of Physical Therapy On Respiratory Parameters In Mechanically Ventilated Patients. *Am J Resp Crit Care Med* 2017;195:A2740.
30. Egger M, Davey Smith G, Schneider M, Minder C. Bias in meta-analysis detected by a simple, graphical test. *BMJ* 1997;315:629–634.
